# Supplementary material for: Classification of Polish Natural Bee Honeys Based on Their Chemical Composition
Source: MDPI journal article supplement (doi:10.3390/molecules27154844), 2022-07-28
Supplement: s1 [file s1]

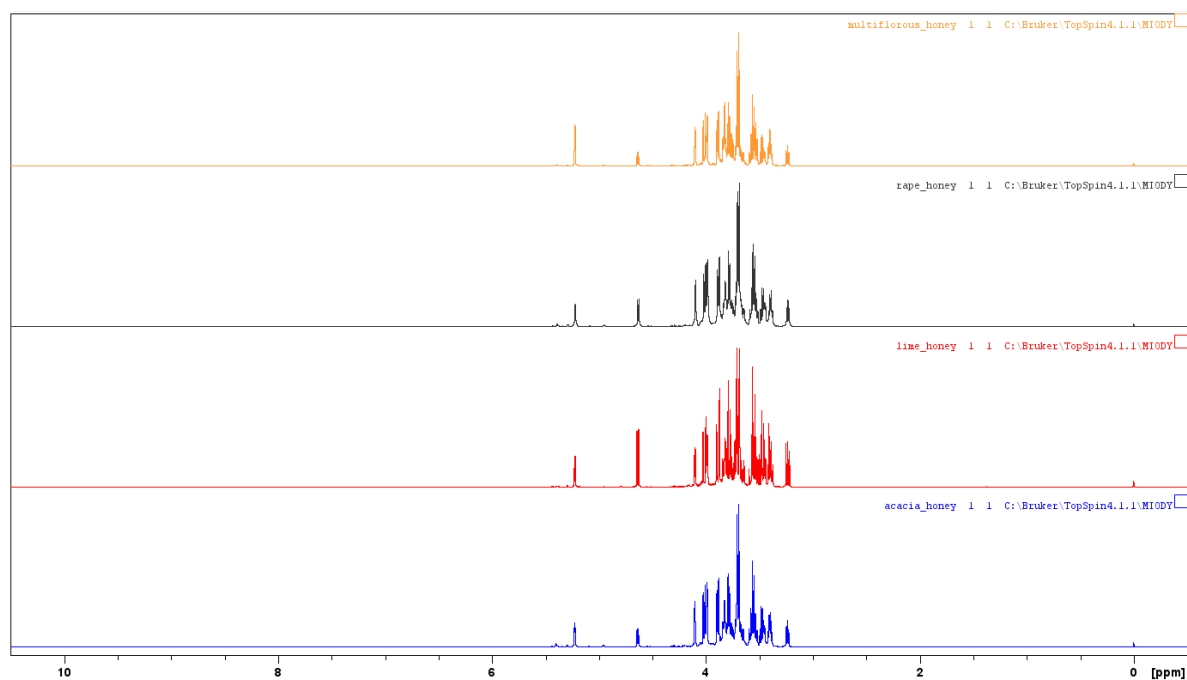

**Figure S1.**  $^1\text{H}$  NMR spectra of lime, rape, acacia and multifloral Polish honey samples in spectral region from 0 to 11 ppm.

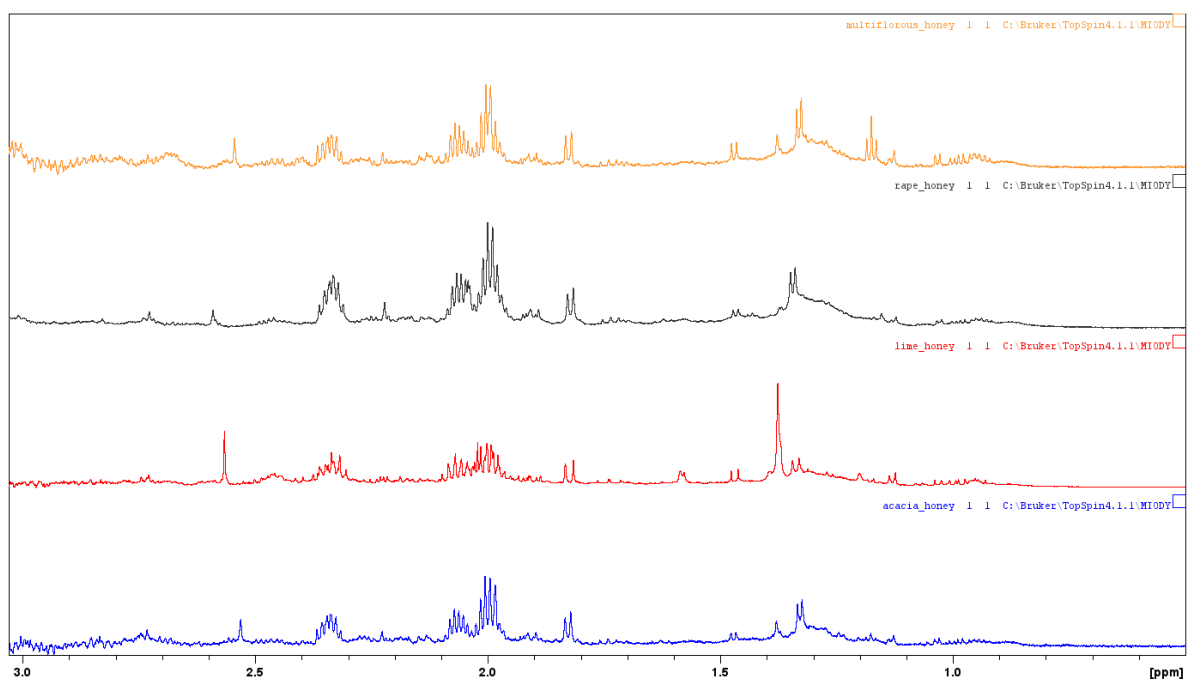

**Figure S2.**  $^1\text{H}$  NMR spectra of lime, rape, acacia and multifloral Polish honey samples in spectral region from 0 to 3 ppm.

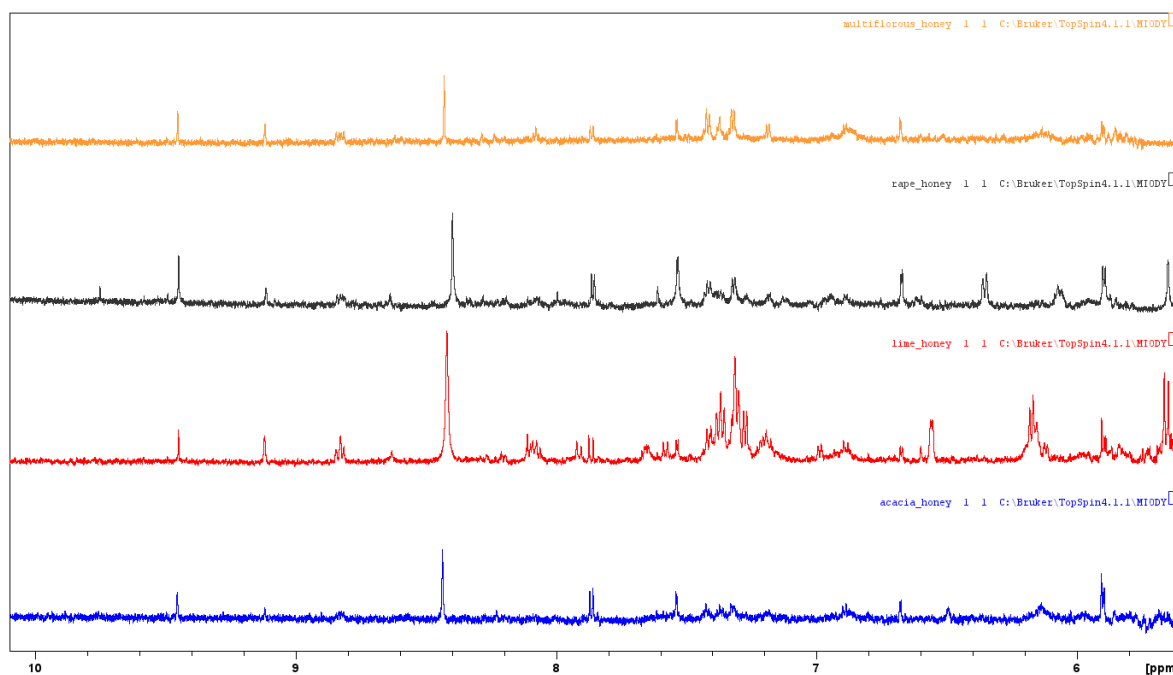

**Figure S3.**  $^1\text{H}$  NMR spectra of lime, rape, acacia and multifloral Polish honey samples in spectral region from 5.6 to 10 ppm.

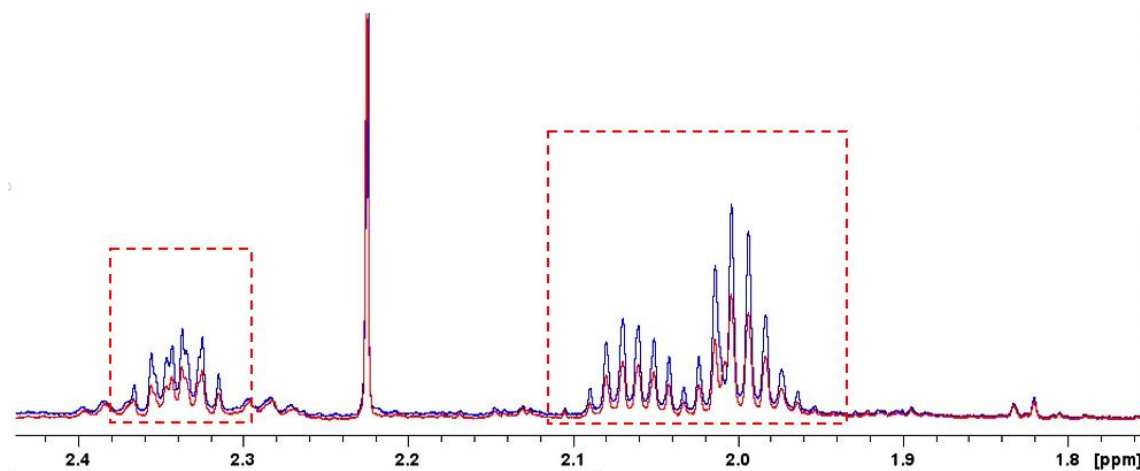

**Figure S4.** Expanded region of  $^1\text{H}$  NMR spectrum of accacia honey sample (red spectrum) spiked with proline solution (blue spectrum).

$^{13}\text{C}$  NMR spectra of analyzed honeys consisted mainly of fructose (fructofuranose and fructopyranose), glucose and sucrose signals.

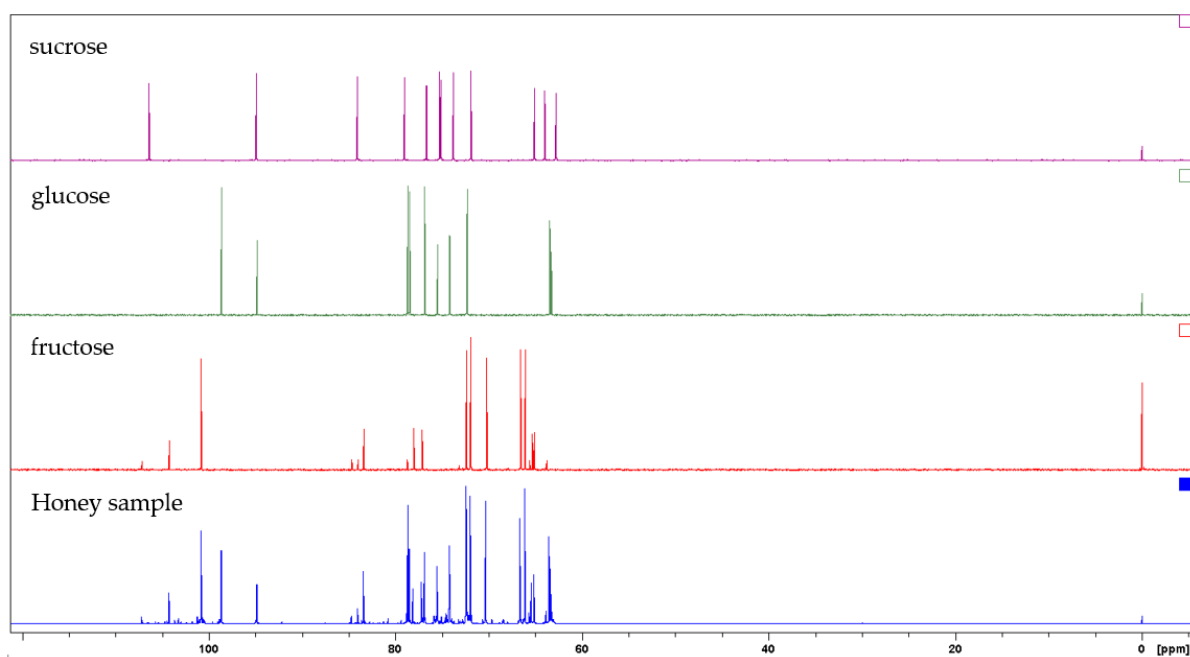

**Figure S5.**  $^{13}\text{C}$  NMR spectrum of lime honey sample with  $^{13}\text{C}$  spectra of standard sample of fructose, glucose and sucrose.

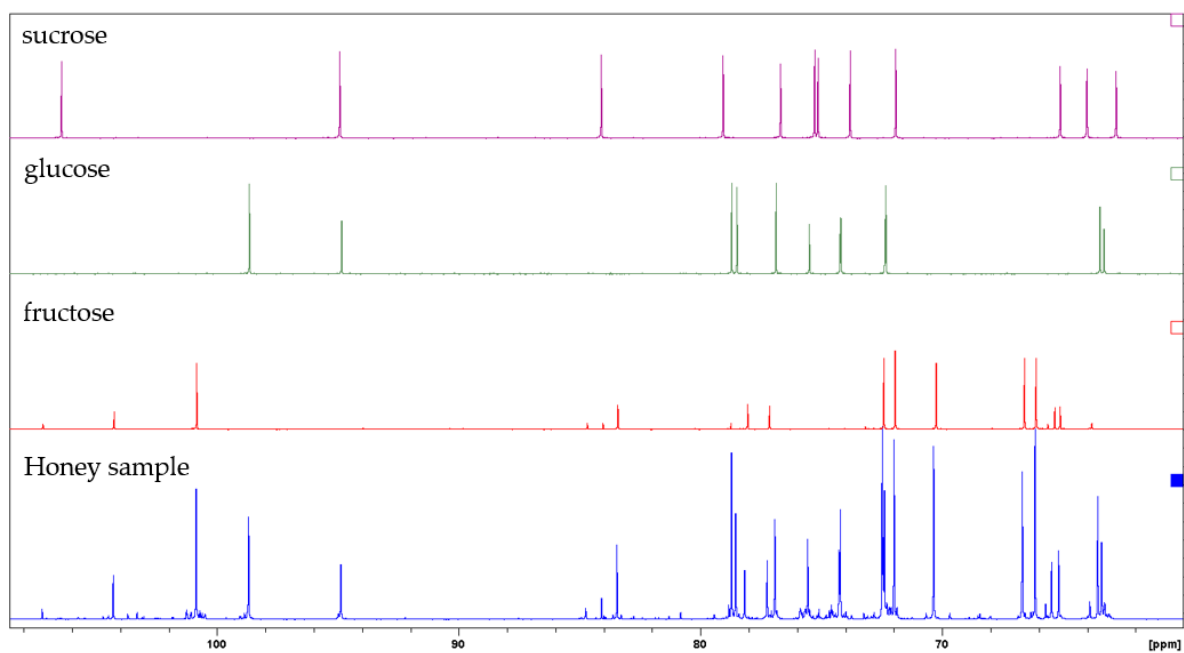

**Figure S6.** Expanded region of  $^{13}\text{C}$  NMR spectrum of lime honey sample with  $^{13}\text{C}$  spectra of standard sample of fructose, glucose and sucrose.

**Table S1.** The main compounds assigned in  $^1\text{H}$  NMR spectra of honey samples, their diagnostic  $^1\text{H}$  signals, chemical shifts  $\delta_{\text{H}}$ , coupling constants, and multiplicities.

|           | Compound                              | Chemical shift [ppm]<br>(multiplet)                  |
|-----------|---------------------------------------|------------------------------------------------------|
| <b>1</b>  | Valine                                | 0.97 (d), 1.03 (d), J=7.0 Hz                         |
| <b>2</b>  | Ethanol                               | 1.18 (t), J=7.1 Hz                                   |
| <b>3</b>  | Lactic acid                           | 1.33 (d), J=6.9 Hz                                   |
| <b>4</b>  | Dimethyl succinic acid                | 1.37 (s), 2.56 (s)                                   |
| <b>5</b>  | Alanine                               | 1.47 (d), J=7.2 Hz                                   |
| <b>6</b>  | Proline                               | 1.95-2.10 (m)<br>2.29-2.38 (m)                       |
| <b>7</b>  | Fructose                              | 4.11(d), J=3.7 Hz                                    |
| <b>8</b>  | Arabinose                             | 4.49 (d), J=7.8 Hz                                   |
| <b>9</b>  | $\beta$ -glucose<br>$\alpha$ -glucose | 4.64 (d), J=7.9 Hz<br>5.22 (d), J=3.8 Hz             |
| <b>10</b> | Sucrose                               | 5.44 (d), J=3.8 Hz                                   |
| <b>11</b> | Tyrosine                              | 6.91 (d), J=8.3 Hz<br>7.18 (d), J=8.3 Hz             |
| <b>12</b> | Phenylalanine                         | 7.28 (d) J=7.6 Hz<br>7.37 (t)<br>7.40(t)             |
| <b>13</b> | 5-(hydroxymethyl)furfural             | 6.67 (d), J=3.7 Hz<br>7.53 (d), J=3.7 Hz<br>9.45 (s) |
| <b>14</b> | 4-chlorobenzoic acid                  | 7.58 (d), J=8.5 Hz<br>7.86 (d), j=8.5 Hz             |
| <b>15</b> | Formic acid*                          | 8.45 (s)                                             |

\* Formic acid was not detected in most of the samples. In four samples it was found in small amounts of 0.54 -0.96 mg/kg.

### 3. Calibration curves for quantified compounds.

To check linearity of proposed method  $^1\text{H}$  NMR spectra for 8 series of selected compounds were recorded. In the case of glucose solutions (0.48, 0.96, 1.92, 4.21, 8.43, 17.50, 33.71 and 66.82 g/100g)  $^1\text{H}$  NMR spectra were measured with two different repetition time:  $T_r = 6\text{s}$  and  $8.5\text{s}$ . Calibration curves for Glc were presented in the main manuscript. Each sample was analyzed in triplicate with random order. The criteria of acceptance: the recovery between 98 to 102%.

**Table S2.** Accuracy of applied method for Glc solutions measured with repetition time  $T_r = 8.5\text{s}$ .

| Numer of sample | Theoretical mass [g] | Experimental mass [g] | Recovery [%] |
|-----------------|----------------------|-----------------------|--------------|
| 1               | 66.82                | $67.05 \pm 0.04$      | 100.34       |
| 2               | 33.71                | $33.68 \pm 0.03$      | 99.91        |
| 3               | 17.50                | $17.48 \pm 0.04$      | 99.86        |
| 4               | 8.43                 | $8.46 \pm 0.03$       | 100.35       |
| 5               | 4.21                 | $4.24 \pm 0.03$       | 100.71       |
| 6               | 1.92                 | $1.95 \pm 0.04$       | 101.56       |
| 7               | 0.96                 | $1.07 \pm 0.01$       | 111.45       |
| 8               | 0.48                 | $0.49 \pm 0.04$       | 102.08       |

**Table S3.** Accuracy of applied method for Glc solutions measured with repetition time  $T_r = 6\text{s}$ .

| Number of sample | Theoretical mass [g] | Experimental mass [g] | Recovery [%] |
|------------------|----------------------|-----------------------|--------------|
| 1                | 66.82                | $65.71 \pm 0.01$      | 98.34        |
| 2                | 33.71                | $33.90 \pm 0.02$      | 100.56       |
| 3                | 17.50                | $17.51 \pm 0.03$      | 100.06       |
| 4                | 8.43                 | $8.40 \pm 0.02$       | 99.64        |
| 5                | 4.21                 | $4.19 \pm 0.05$       | 99.52        |
| 6                | 1.92                 | $1.91 \pm 0.03$       | 99.47        |
| 7                | 0.96                 | $0.96 \pm 0.02$       | 100.00       |
| 8                | 0.48                 | $0.47 \pm 0.03$       | 97.91        |

## Calibration curve for fructose

In the case of fructose solutions (0.5, 5.22, 15.10, 30.26, 45.62, 60.12, 85.44 and 100 g/100g)  $^1\text{H}$  NMR spectra were measured with selected repetition time:  $T_r = 6\text{s}$ . Each sample was analyzed in triplicate with random order. The criteria of acceptance: the recovery between 98 to 102%.

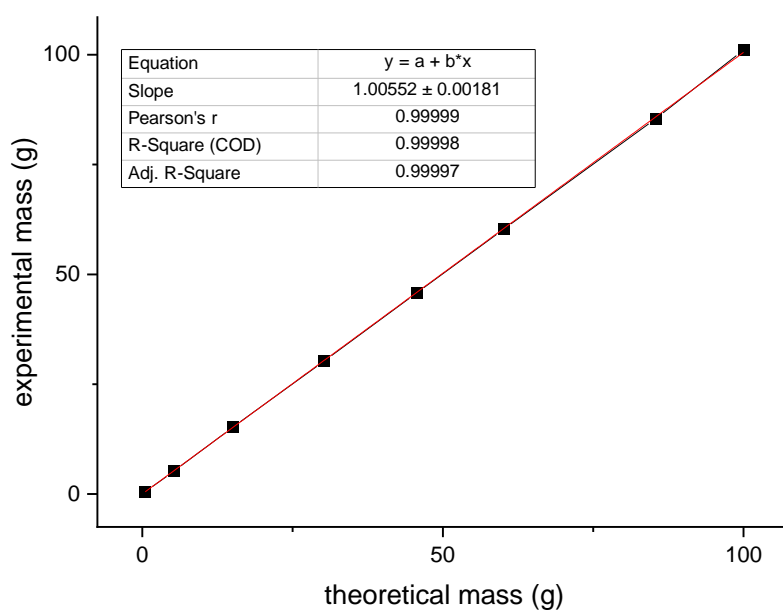

**Figure S7.** Linearity of the method for fructose with repetition time equals 6s.

**Table S4.** Accuracy of applied method for fructose solutions measured with repetition time  $T_r = 6\text{ s}$ .

| Numer of sample | Theoretical mass [mg] | Experimental mass [mg] | Recovery [%] |
|-----------------|-----------------------|------------------------|--------------|
| 1               | 0.50                  | 0.49± 0.03             | 98.00        |
| 2               | 5.12                  | 5.17±0.02              | 100.97       |
| 3               | 15.10                 | 15.24±0.01             | 100.93       |
| 4               | 30.26                 | 30.31±0.03             | 101.16       |
| 5               | 45.62                 | 45.78±0.03             | 100.35       |
| 6               | 60.12                 | 60.29±0.04             | 100.28       |
| 7               | 85.44                 | 85.47±0.03             | 100.04       |
| 8               | 100.00                | 101.1±0.02             | 101.10       |

## Calibration curve for sucrose

In the case of sucrose solutions (0.05, 0.25, 0.63, 1.44, 2.88, 5.22, 7.89 and 10 g/100g)  $^1\text{H}$  NMR spectra were measured with selected repetition time:  $T_r=6\text{s}$ . Each sample was analyzed in triplicate with random order. The criteria of acceptance: the recovery between 98 to 102%.

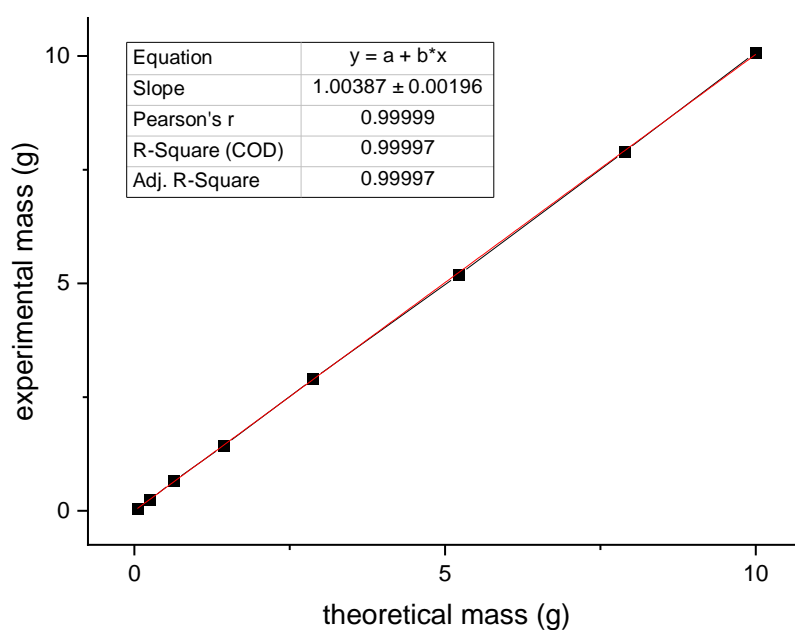

**Figure S8.** Linearity of the method for sucrose with repetition time equals 6s.

**Table S5.** Accuracy of applied method for sucrose solutions measured with repetition time  $T_r=6\text{ s}$ .

| Numer of sample | Theoretical mass [mg] | Experimental mass [mg] | Recovery [%] |
|-----------------|-----------------------|------------------------|--------------|
| 1               | 0.05                  | 0.051± 0.01            | 102.00       |
| 2               | 0.25                  | 0.24±0.03              | 96.00        |
| 3               | 0.63                  | 0.65±0.01              | 103.17       |
| 4               | 1.44                  | 1.43±0.02              | 99.31        |
| 5               | 2.88                  | 2.90±0.03              | 100.69       |
| 6               | 5.22                  | 5.19±0.02              | 99.43        |
| 7               | 7.89                  | 7.90±0.02              | 100.13       |
| 8               | 10.00                 | 10.08±0.01             | 100.80       |

## Calibration curve for Alanine

In the case of Ala solutions (0.49, 1.11, 1.64, 4.34, 6.03, 7.25, 8.48 and 10 mg/100g)  $^1\text{H}$  NMR spectra were measured with selected repetition time:  $T_r = 6\text{ s}$ . Each sample was analyzed in triplicate with random order. The criteria of acceptance: the recovery between 98 to 102%.

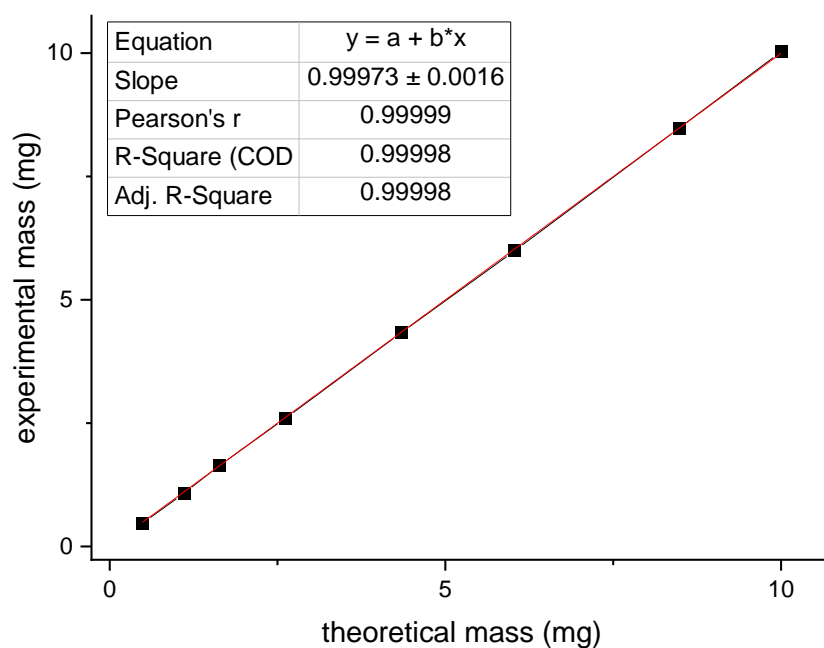

**Figure S9.** Linearity of the method for Ala with repetition time equals 6s.

**Table S6** Accuracy of applied method for Ala solutions measured with repetition time  $T_r = 6\text{ s}$ .

| Numer of sample | Theoretical mass [mg] | Experimental mass [mg] | Recovery [%] |
|-----------------|-----------------------|------------------------|--------------|
| 1               | 0.49                  | 0.47±0.01              | 95.92        |
| 2               | 1.11                  | 1.08±0.02              | 97.30        |
| 3               | 1.64                  | 1.65±0.01              | 100.61       |
| 4               | 2.62                  | 2.60±0.01              | 99.24        |
| 5               | 4.34                  | 4.33±0.02              | 99.77        |
| 6               | 6.03                  | 5.99±0.02              | 99.34        |
| 7               | 8.48                  | 8.48±0.02              | 100.00       |
| 8               | 10.00                 | 10.03±0.02             | 100.30       |



## Calibration curve for Phenylalanine

In the case of Phe solutions (0.50, 1.52, 3.39, 6.55, 9.40, 11.53, 17.38 and 20 mg/100g)  $^1\text{H}$  NMR spectra were measured with selected repetition time:  $T_r = 6\text{ s}$ . Each sample was analyzed in triplicate with random order. The criteria of acceptance: the recovery between 98 to 102%.

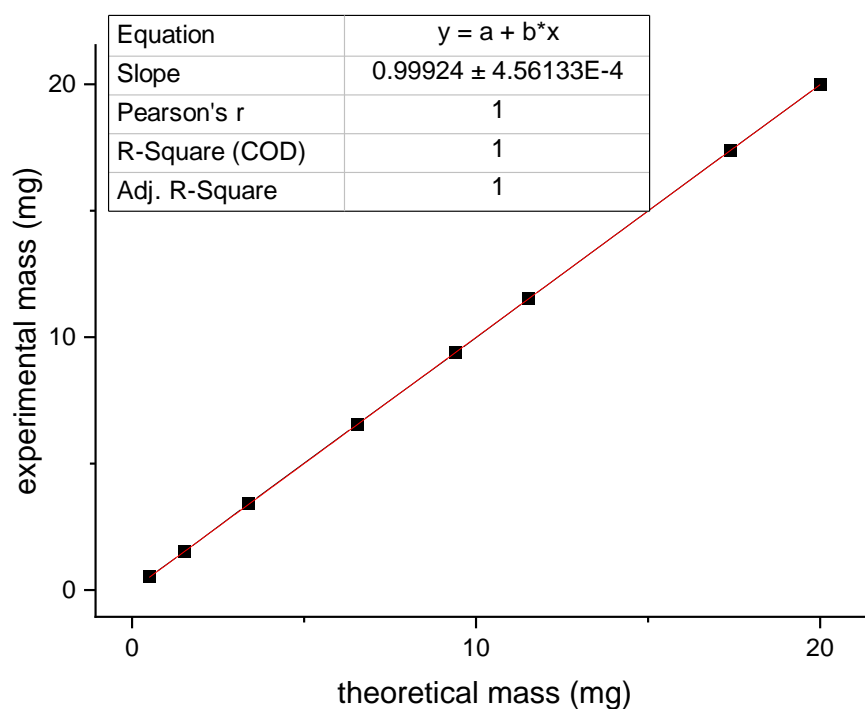

**Figure S10.** Linearity of the method for Phe with repetition time equals 6s.

**Table S7.** Accuracy of applied method for Phe solutions measured with repetition time  $T_r = 6\text{ s}$ .

| Numer of sample | Theoretical mass [mg] | Experimental mass [mg] | Recovery [%] |
|-----------------|-----------------------|------------------------|--------------|
| 1               | 0.50                  | 0.52± 0.04             | 104.00       |
| 2               | 1.52                  | 1.51±0.04              | 99.34        |
| 3               | 3.39                  | 3.41±0.04              | 100.59       |
| 4               | 6.55                  | 6.56±0.03              | 100.15       |
| 5               | 9.40                  | 9.38±0.04              | 99.79        |
| 6               | 11.53                 | 11.52±0.03             | 99.91        |
| 7               | 17.38                 | 17.37±0.01             | 99.94        |
| 8               | 20.00                 | 19.98±0.02             | 99.90        |

## Calibration curve for tyrosine

In the case of Tyr solutions (0.48, 1.55, 3.26, 7.31, 10.45, 13.50, 16.40 and 20.07 mg/100g)  $^1\text{H}$  NMR spectra were measured with selected repetition time:  $T_r = 6\text{ s}$ . Each sample was analyzed in triplicate with random order. The criteria of acceptance: the recovery between 98 to 102%.

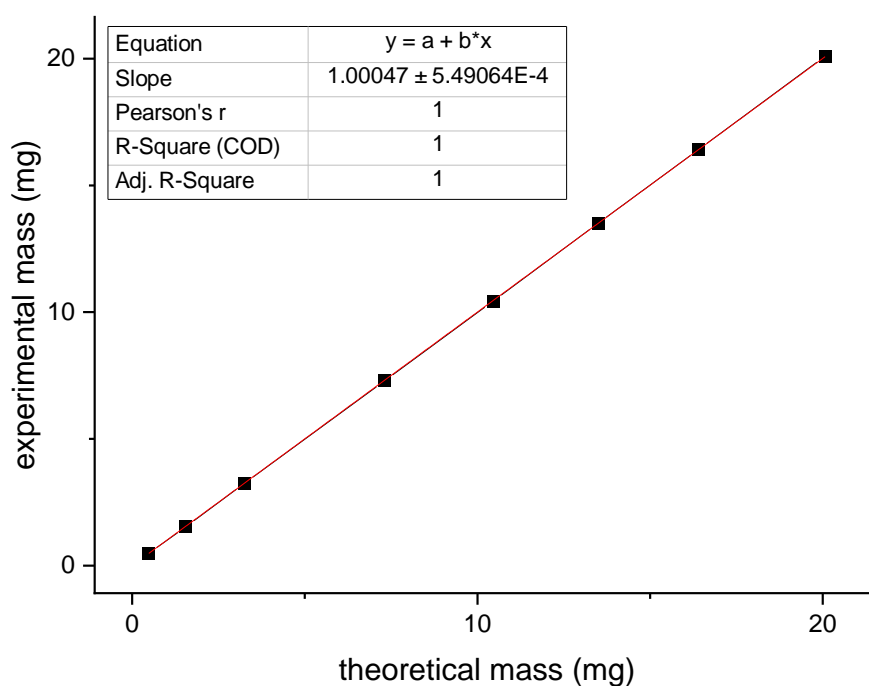

**Figure S11.** Linearity of the method for Tyr with repetition time equals 6s.

**Table S8.** Accuracy of applied method for Tyr solutions measured with repetition time  $T_r = 6\text{ s}$ .

| Numer of sample | Theoretical mass [mg] | Experimental mass [mg] | Recovery [%] |
|-----------------|-----------------------|------------------------|--------------|
| 1               | 0.48                  | 0.48± 0.02             | 100.00       |
| 2               | 1.55                  | 1.53±0.03              | 98.71        |
| 3               | 3.26                  | 3.25±0.02              | 99.69        |
| 4               | 7.31                  | 7.29±0.03              | 99.73        |
| 5               | 10.45                 | 10.43±0.03             | 99.81        |
| 6               | 13.50                 | 13.51±0.01             | 100.07       |
| 7               | 16.41                 | 16.42±0.02             | 100.06       |
| 8               | 20.07                 | 20.10±0.01             | 100.15       |

## Calibration curve for proline

In the case of Pro solutions (0.52, 1.57, 4.98, 10.86, 22.18, 49.87, 67.32 and 80.12 mg/100g)  $^1\text{H}$  NMR spectra were measured with selected repetition time:  $T_r = 6\text{ s}$ . Each sample was analyzed in triplicate with random order. The criteria of acceptance: the recovery between 98 to 102%.

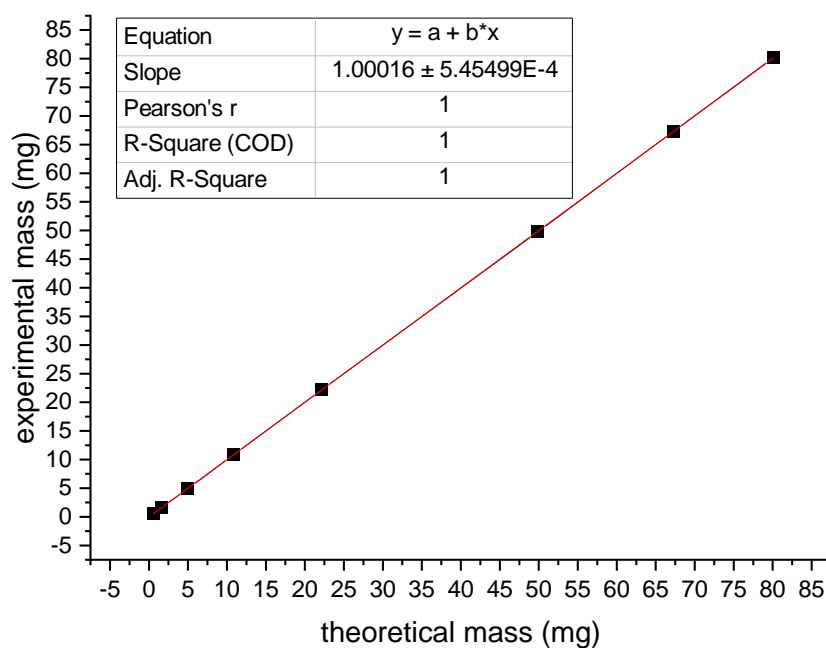

**Figure S12.** Linearity of the method for Pro with repetition time equals 6s.

**Table S9.** Accuracy of applied method for Pro solutions measured with repetition time  $T_r = 6\text{ s}$ .

| Numer of sample | Theoretical mass [mg] | Experimental mass [mg] | Recovery [%] |
|-----------------|-----------------------|------------------------|--------------|
| 1               | 0.52                  | 0.54± 0.03             | 103.85       |
| 2               | 1.57                  | 1.59±0.01              | 98.59        |
| 3               | 4.98                  | 4.91±0.02              | 99.82        |
| 4               | 10.86                 | 10.84±0.03             | 100.09       |
| 5               | 22.18                 | 22.20±0.03             | 99.76        |
| 6               | 49.87                 | 49.75±0.03             | 100.04       |
| 7               | 67.32                 | 67.35±0.04             | 100.10       |
| 8               | 80.12                 | 80.20±0.02             | 101.27       |

## Calibration curve for hydroxymethylfurfural

In the case of HMF solutions (0.50, 0.97, 1.48, 2.51, 5.52, 10.11, 18.66 and 30.25 mg/1000g)  $^1\text{H}$  NMR spectra were measured with selected repetition time:  $T_r = 6\text{ s}$ . Each sample was analyzed in triplicate with random order. The criteria of acceptance: the recovery between 95 to 105%.

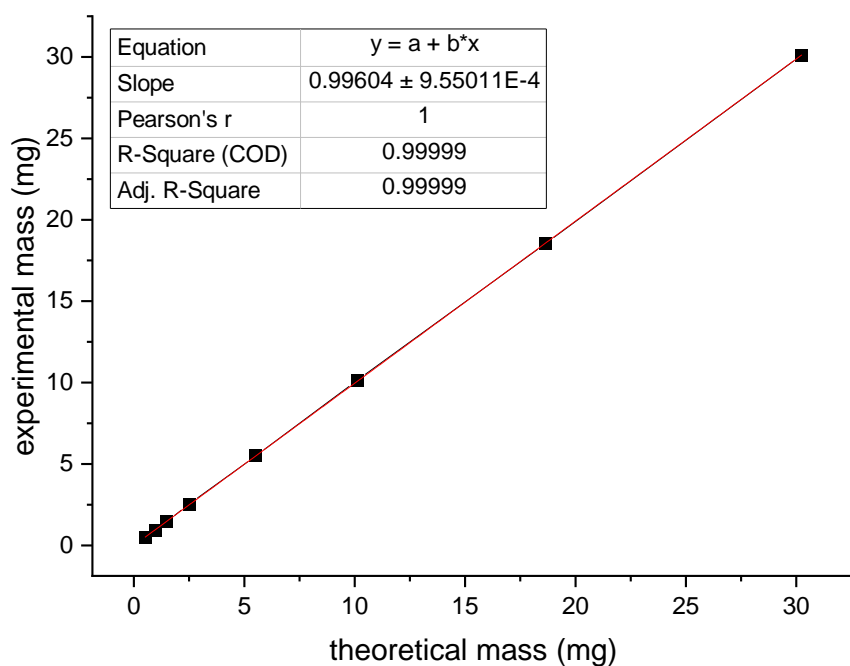

**Figure S13.** Linearity of the method for HMF with repetition time equals 6s.

**Table S10.** Accuracy of applied method for HMF solutions measured with repetition time  $T_r = 6\text{ s}$ .

| Numer of sample | Theoretical mass [mg] | Experimental mass [mg] | Recovery [%] |
|-----------------|-----------------------|------------------------|--------------|
| 1               | 0.50                  | 0.48± 0.04             | 96.00        |
| 2               | 0.97                  | 0.95±0.03              | 97.94        |
| 3               | 1.48                  | 1.46±0.03              | 98.65        |
| 4               | 2.51                  | 2.55±0.02              | 101.59       |
| 5               | 5.52                  | 5.50±0.03              | 99.64        |
| 6               | 10.11                 | 10.14±0.02             | 100.30       |
| 7               | 18.66                 | 18.56±0.01             | 99.46        |
| 8               | 30.25                 | 30.12±0.01             | 99.57        |
